# Supplementary material for: Incretin effect determines glucose trajectory and insulin sensitivity in youths with obesity
Source: PubMed Central journal article supplement (PMC10721315; doi:10.1172/jci.insight.165709), 2023-11-22
Supplement: jciinsight-8-165709-s160.pdf [file jciinsight-8-165709-s160.pdf]

**Supplemental Table 1.** Baseline characteristics of those who returned for the follow-up OGTT (complete FUP) and those who did not (loos to FUP).

|                                  | High Incretin Effect   |                        | Moderate Incretin Effect |                        | Low Incretin Effect    |                        |
|----------------------------------|------------------------|------------------------|--------------------------|------------------------|------------------------|------------------------|
|                                  | Complete FUP           | Loss to FUP            | Complete FUP             | Loss to FUP            | Complete FUP           | Loss to FUP            |
| <b>Baseline</b>                  | <b>Complete FUP</b>    | <b>Loss to FUP</b>     | <b>Complete FUP</b>      | <b>Loss to FUP</b>     | <b>Complete FUP</b>    | <b>Loss to FUP</b>     |
| <b>N</b>                         | <b>12</b>              | <b>1</b>               | <b>10</b>                | <b>3</b>               | <b>8</b>               | <b>5</b>               |
| <b>Age (years)</b>               | 15.7 (14.5, 17.1)      | 18 (18, 18)            | 16.2 (15, 17)            | 13(12, 14)             | 16.3 (14.0, 19.2)      | 15 (12, 16)            |
| <b>BMI (kg/m<sup>2</sup>)</b>    | 32.5<br>(29.8, 40.3)   | 44.9<br>(44.9, 44.9)   | 37.2<br>(35.7, 40.8)     | 41.0<br>(35.3, 42.6)   | 41<br>(34.0, 45.3)     | 39.8<br>(37, 41.4)     |
| <b>NGT/preIGT/IGT/T2D n (%)</b>  | 0/9/3/0<br>(0/67/33/0) | 0/0/1/0<br>(0/0/100/0) | 0/5/5/0<br>(0/50/50/0)   | 0/2/1/0<br>(0/70/30/0) | 0/4/4/0<br>(0/38/62/0) | 0/1/4/0<br>(0/20/80/2) |
| <b>Sex (F/M/Non-binary) (%)</b>  | 9/3/0<br>(69/21/0)     | 1/0/0 (100/0/0)        | 3/7/0 (31/69/0)          | 2/1/0 (67/33)          | 4/4/0 (50/50/0)        | 3/2/0 (60/40/0)        |
| <b>Ethnicity NHW/NHB/H n (%)</b> | 1/5/6<br>(8/42/50)     | 0/1/0<br>(0/100/0)     | 1/5/4<br>(10/50/40)      | 0/1/2<br>(0/33/67)     | 3/1/4<br>(37/13/50)    | 4/0/1<br>(80/0/20)     |

NGT, normal glucose tolerance; pre-IGT, pre-impaired glucose tolerance; IGT, impaired glucose tolerance; T2D, type 2 diabetes; BMI, body mass index; NHW, non-Hispanic White; NHB, non-Hispanic Black; H, Hispanic; FUP, follow-up.
